# Supplementary material for: Effectiveness of an Electronic Automated Antibiotic Time Out Alert in the Setting of Gram-Negative Bacteremia
Source: MDPI journal article supplement (doi:10.3390/antibiotics10091078), 2021-09-06
Supplement: s1 [file s1]

## Supplementary Materials

### Antibiotic Time Out (ATO) Data

**Table S1.** Antibiotic Time Out Data for Intervention Cohort.

| Antibiotic at Time of Alert | Eligible for ATO Alert | Modified within 24 hours of culture results | Modified at any point in therapy (after 24 hours) |
|-----------------------------|------------------------|---------------------------------------------|---------------------------------------------------|
| Piperacillin-tazobactam     | 65                     | 27                                          | 59                                                |
| Ceftriaxone                 | 15                     | 0                                           | 5                                                 |
| Meropenem                   | 13                     | 5                                           | 12                                                |
| Levofloxacin                | 5                      | 1                                           | 3                                                 |
| Ertapenem                   | 4                      | 1                                           | 1                                                 |
| Aztreonam                   | 4                      | 1                                           | 4                                                 |
| Ceftazidime                 | 1                      | 0                                           | 0                                                 |
| Ampicillin-sulbactam        | 1                      | 0                                           | 1                                                 |
| Ceftazidime-avibactam       | 1                      | 0                                           | 1                                                 |
| Cefepime                    | 0                      | 1                                           | 1                                                 |
| Ceftolozane-tazobactam      | 0                      | 0                                           | 1                                                 |
| <b>Grand Total</b>          | <b>109</b>             | <b>36</b>                                   | <b>88</b>                                         |
